# Supplementary material for: Machine learning in predicting respiratory failure in patients with COVID-19 pneumonia—Challenges, strengths, and opportunities in a global health emergency
Source: PubMed Central journal article supplement (PMC7660476; doi:10.1371/journal.pone.0239172), 2020-11-12

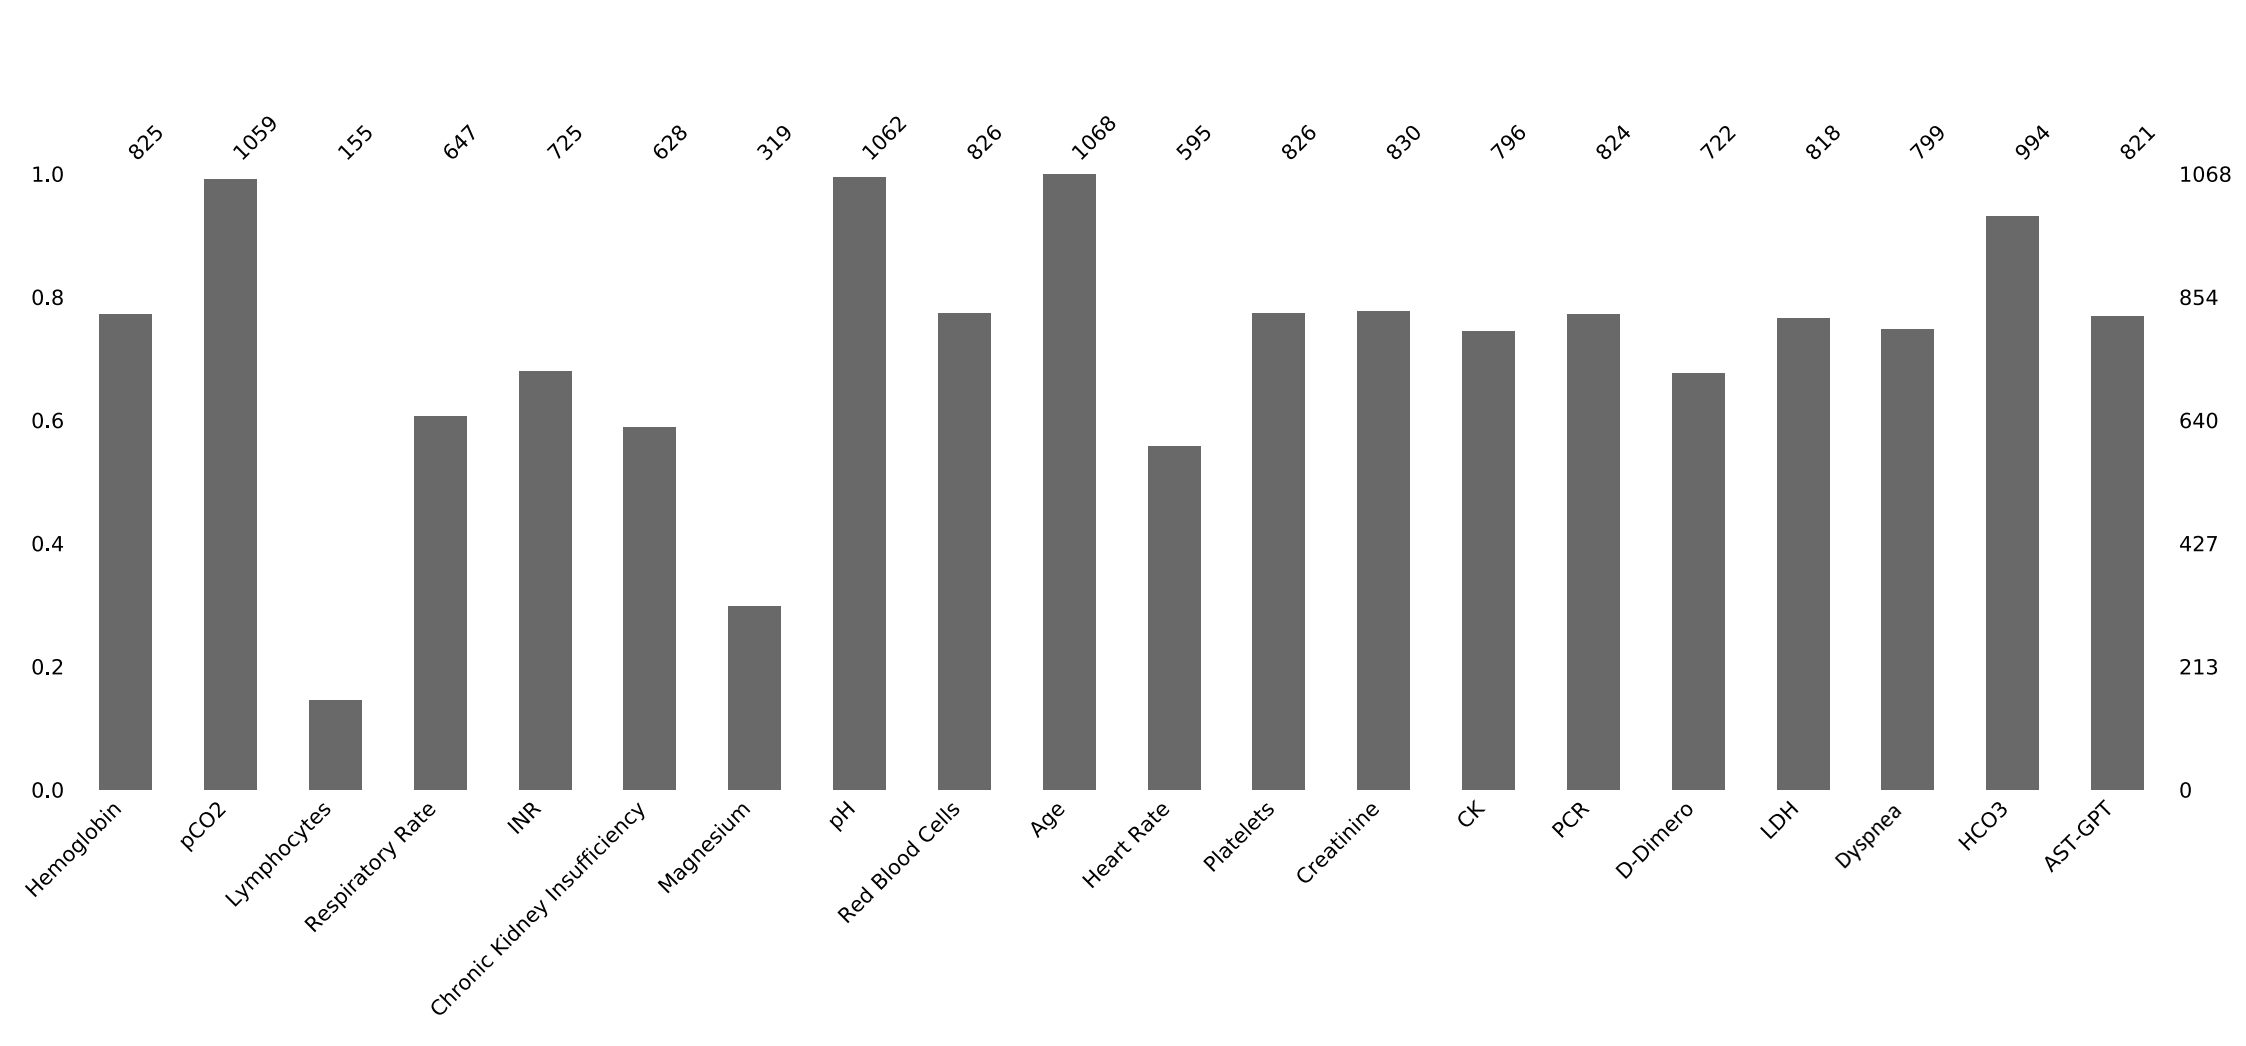

Supplement: pone.0239172.s001.pdf [file pone.0239172.s001.pdf]
